# Supplementary material for: Quantitative surface-enhanced Raman spectroscopy chemical analysis using citrate as an in situ calibrant
Source: Royal Society of Chemistry journal article supplement (doi:10.1039/c8an02170h), 2019-01-01
Supplement: c8an02170h1.pdf [file c8an02170h1.pdf]

## SUPPLEMENTARY INFORMATION

# Quantitative Surface-Enhanced Raman Spectroscopy Chemical Analysis using Citrate as an *in-situ* Calibrant

Reza Salemmilani,<sup>†,‡</sup> Rustin Y. Mirsafavi,<sup>§,‡</sup> Augustus W. Fountain, III,<sup>⊥</sup> Martin Moskovits,<sup>∇</sup>  
Carl D. Meinhart<sup>†,\*</sup>

<sup>†</sup>Department of Mechanical Engineering, University of California Santa Barbara, Santa Barbara, California 93106, United States

<sup>§</sup>Department of Biomolecular Science and Engineering, University of California Santa Barbara, Santa Barbara, California 93106, United States

<sup>⊥</sup>Edgewood Chemical and Biological Center, Edgewood, Maryland 21010, United States

<sup>∇</sup>Department of Chemistry and Biochemistry, University of California Santa Barbara, Santa Barbara, California 93106, United States

<sup>‡</sup>Equal contribution authors

\*address correspondence to: [Meinhart@ucsb.edu](mailto:Meinhart@ucsb.edu)

**Figure S1-** Representative raw Raman spectra for experiments with each of the three analytes.

**A.**

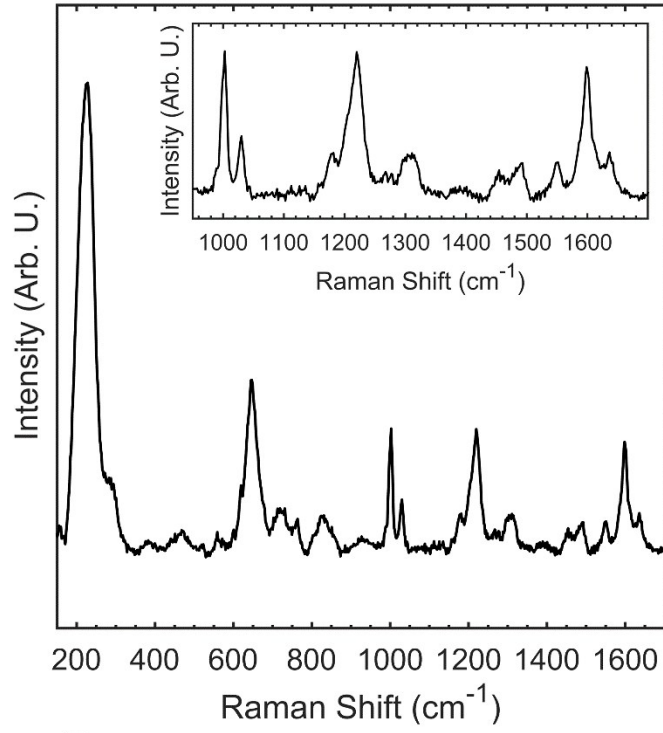

**B.**

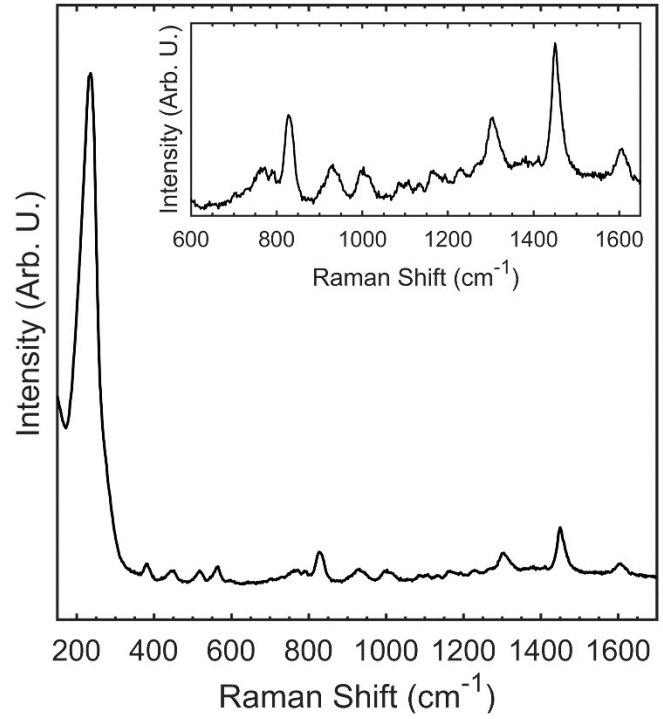

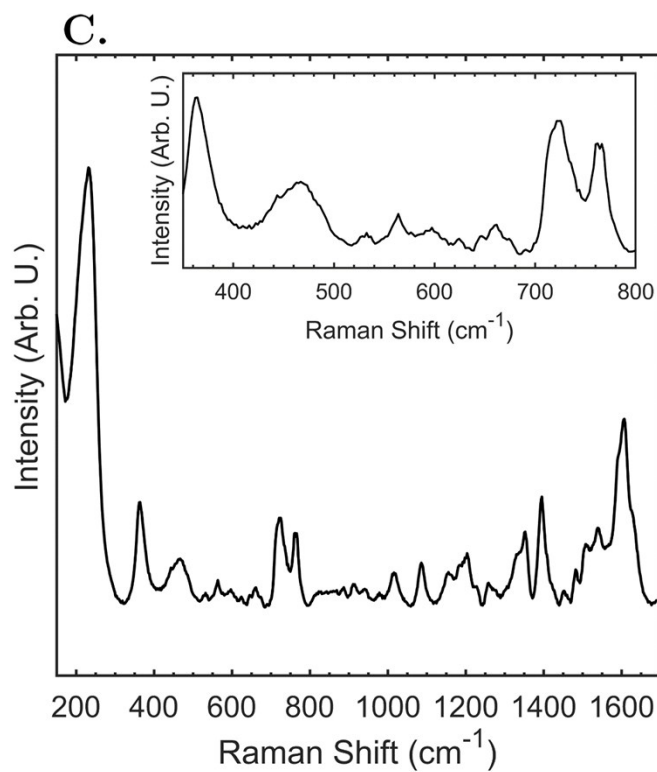

**Figure S1.** Representative raw Raman spectra. Insets depict the portions of the spectra that were chosen for the CLS analysis. Experiments were carried out using the microfluidic chip as described in the paper. Spectra contain features of citrate and of the following analytes at the stated concentration: (A) 1 mM methamphetamine, (B) 1  $\mu\text{M}$  cocaine, and (C) 100  $\mu\text{M}$  papaverine.
